# Supplementary material
Source: PubMed Central journal article supplement (PMC4833077)

**Supplementary Figure S1-** Distribution of the posterior probability to be in sweep state along the identified sweep windows. The different graphs represent each chromosome (for instance “c1” is chromosome 1) in each population (FW, C) and each dashed curve highlights the distribution of the posterior probability along a given sweep window. For straightforward comparison among sweep windows, these distributions were centered on the middle of each sweep window.

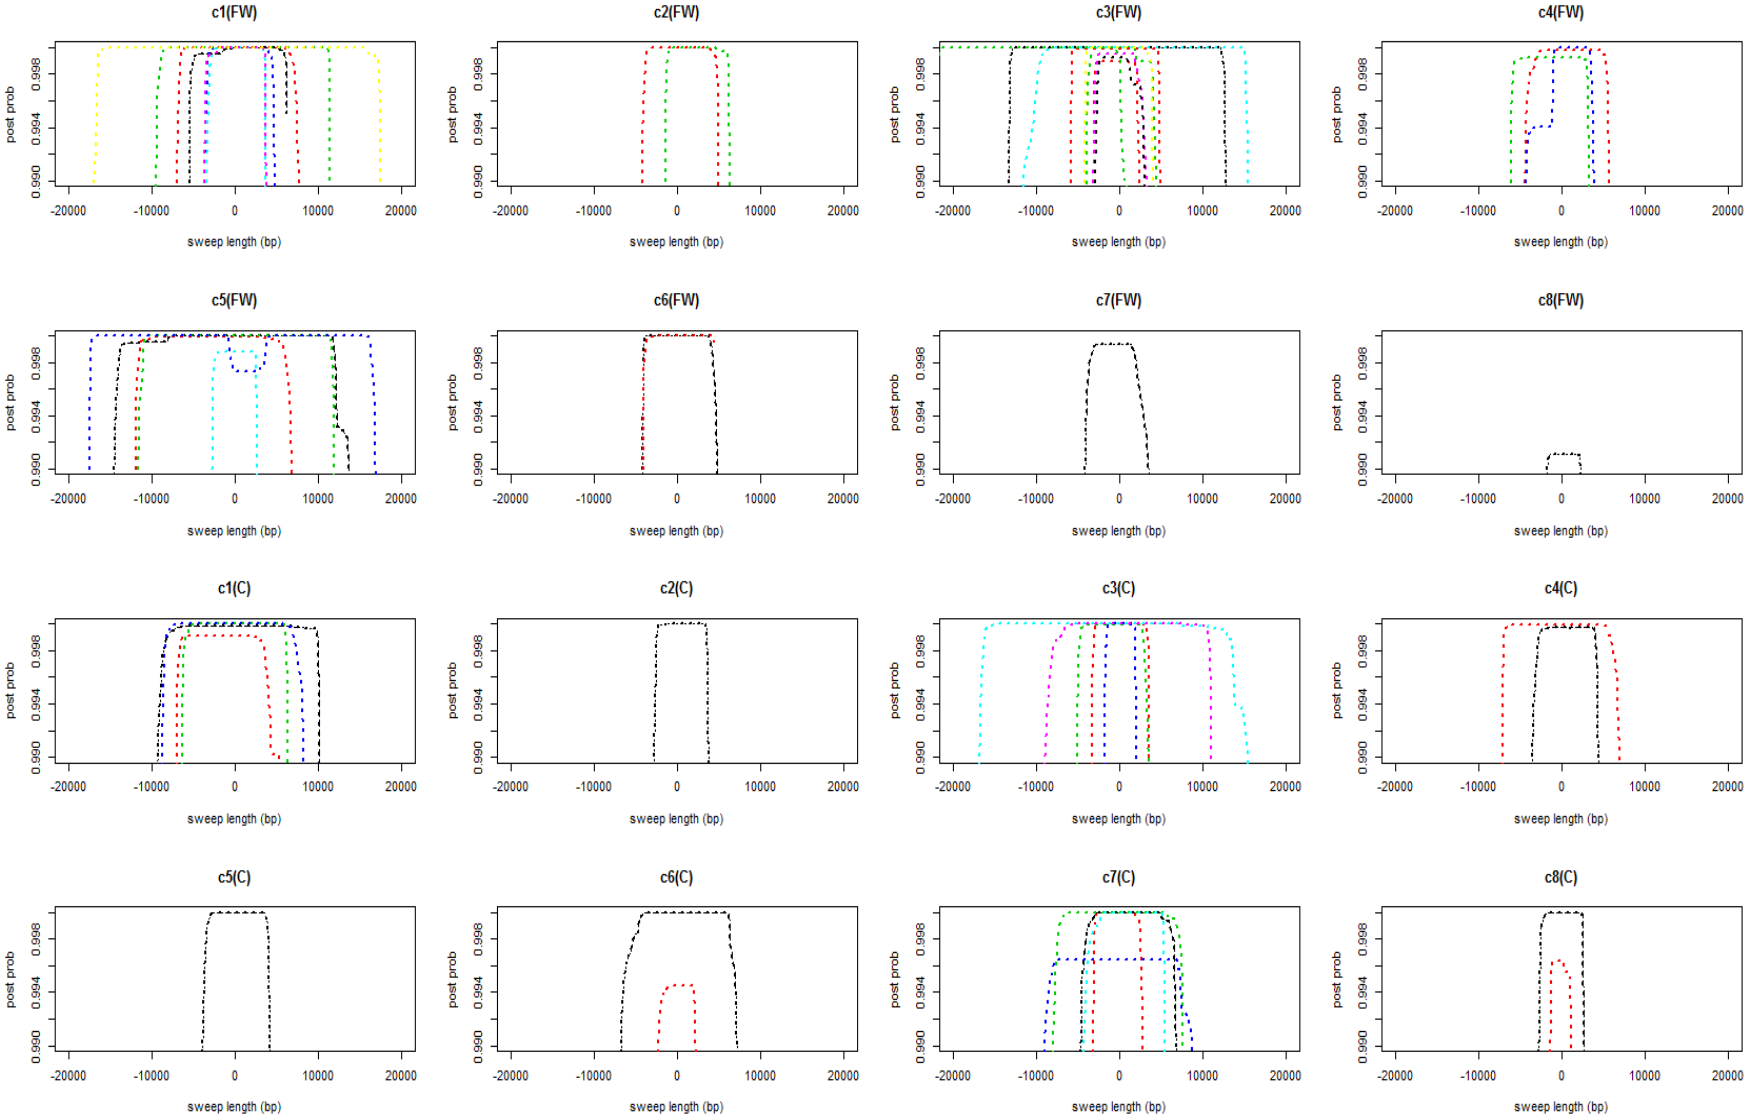

**Supplementary Figure S2-** Distribution of Gene Ontology terms for genes under selective sweep in *M. truncatula* populations. The three major ontology terms are represented: “Molecular Function”, “Biological Process” and “Cellular Component”. White and grey parts in the pies indicate common and population-specific GO terms, respectively.

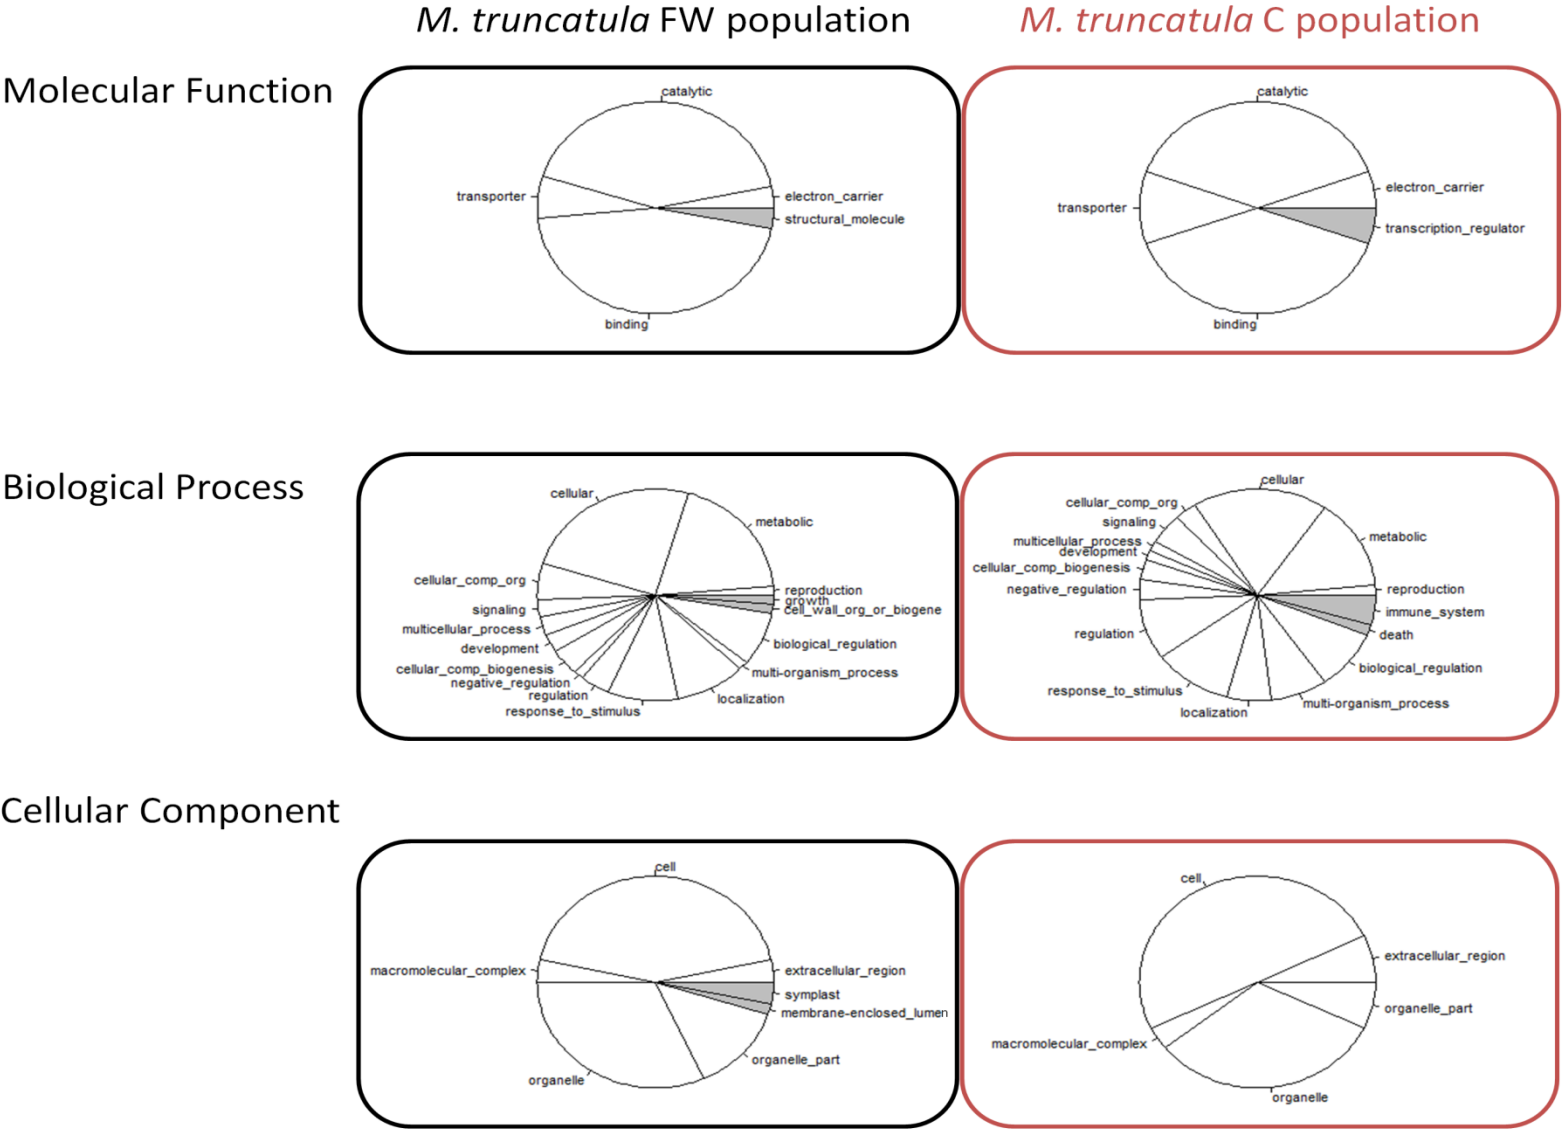

Supplement: supp_msv092_Supplementary_Figures.pdf [file supp_msv092_Supplementary_Figures.pdf]
